# Supplementary material for: Microfluidic Chip-Based Induced Phase Separation Extraction as a Fast and Efficient Miniaturized Sample Preparation Method
Source: MDPI journal article supplement (doi:10.3390/molecules26010038), 2020-12-23
Supplement: s1 [file s1]

**Supplementary Materials belonging to the paper entitled “Microfluidic chip-based induced phase separation extraction as a fast and efficient miniaturized sample preparation method”**  
**by Yao Shen, Bo Chen, Han Zuilhof and Teris A. van Beek**

**Figure S1a.** Relative volume percentages of collected organic phases at microscale (IPSE chip) for both dichloromethane (upper) and chloroform (bottom) used at the 3 flow rates.

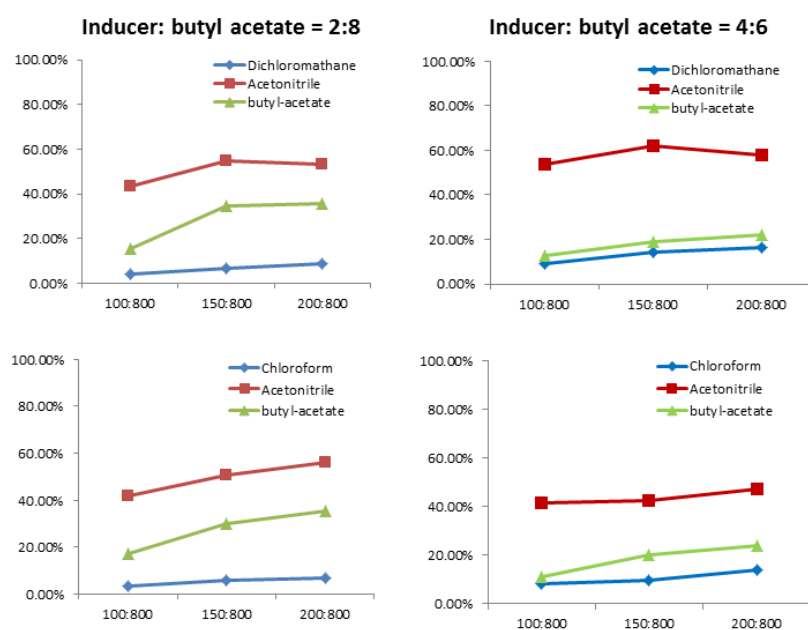

**Figure S1b:** Relative volume percentages of collected aqueous phases at microscale (IPSE chip) for both dichloromethane (upper) and chloroform (bottom) used at the 3 flow rates.

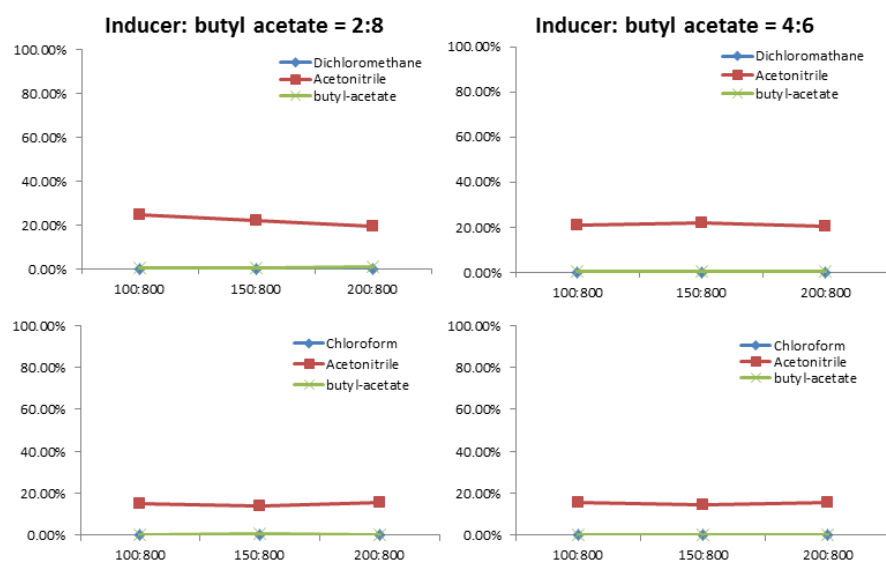

**Figure S2:** Structures of 10 model compounds used for IPSE efficiency test

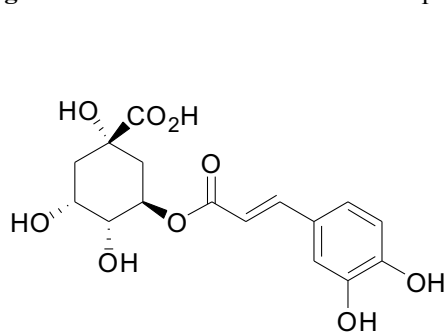

chlorogenic acid

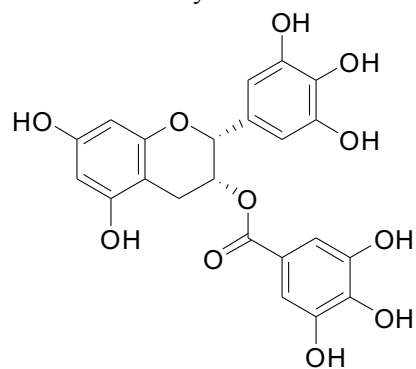

epigallocatechin gallate

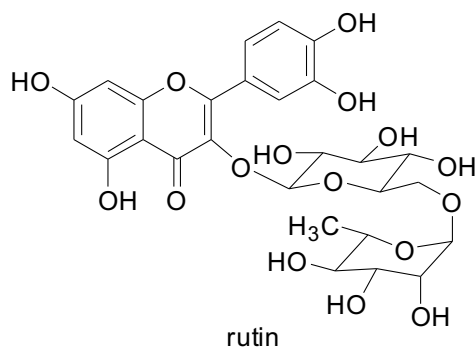

rutin

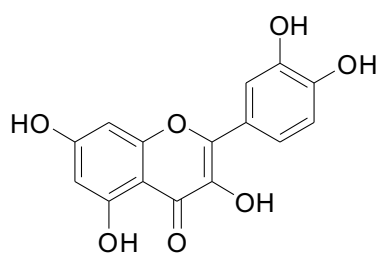

quercetin

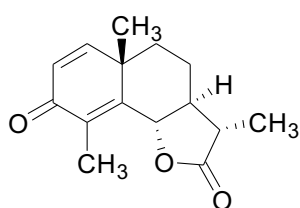

santonin

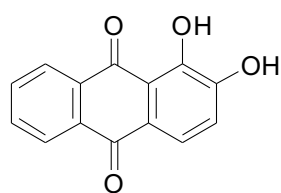

alizarin

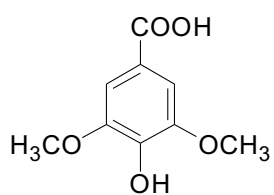

syringic acid

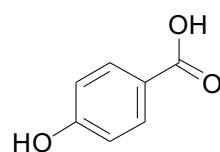

4-hydroxybenzoic acid

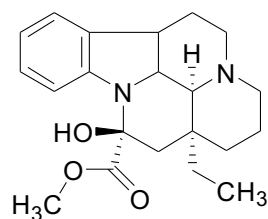

vincamine

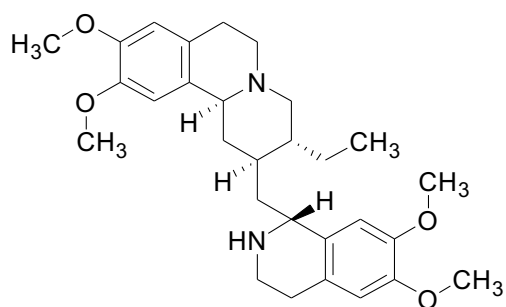

emetine
